# Supplementary material
Source: PubMed Central journal article supplement (PMC3809782)
Supplement: JCI67615sd.pdf [file JCI67615sd.pdf]

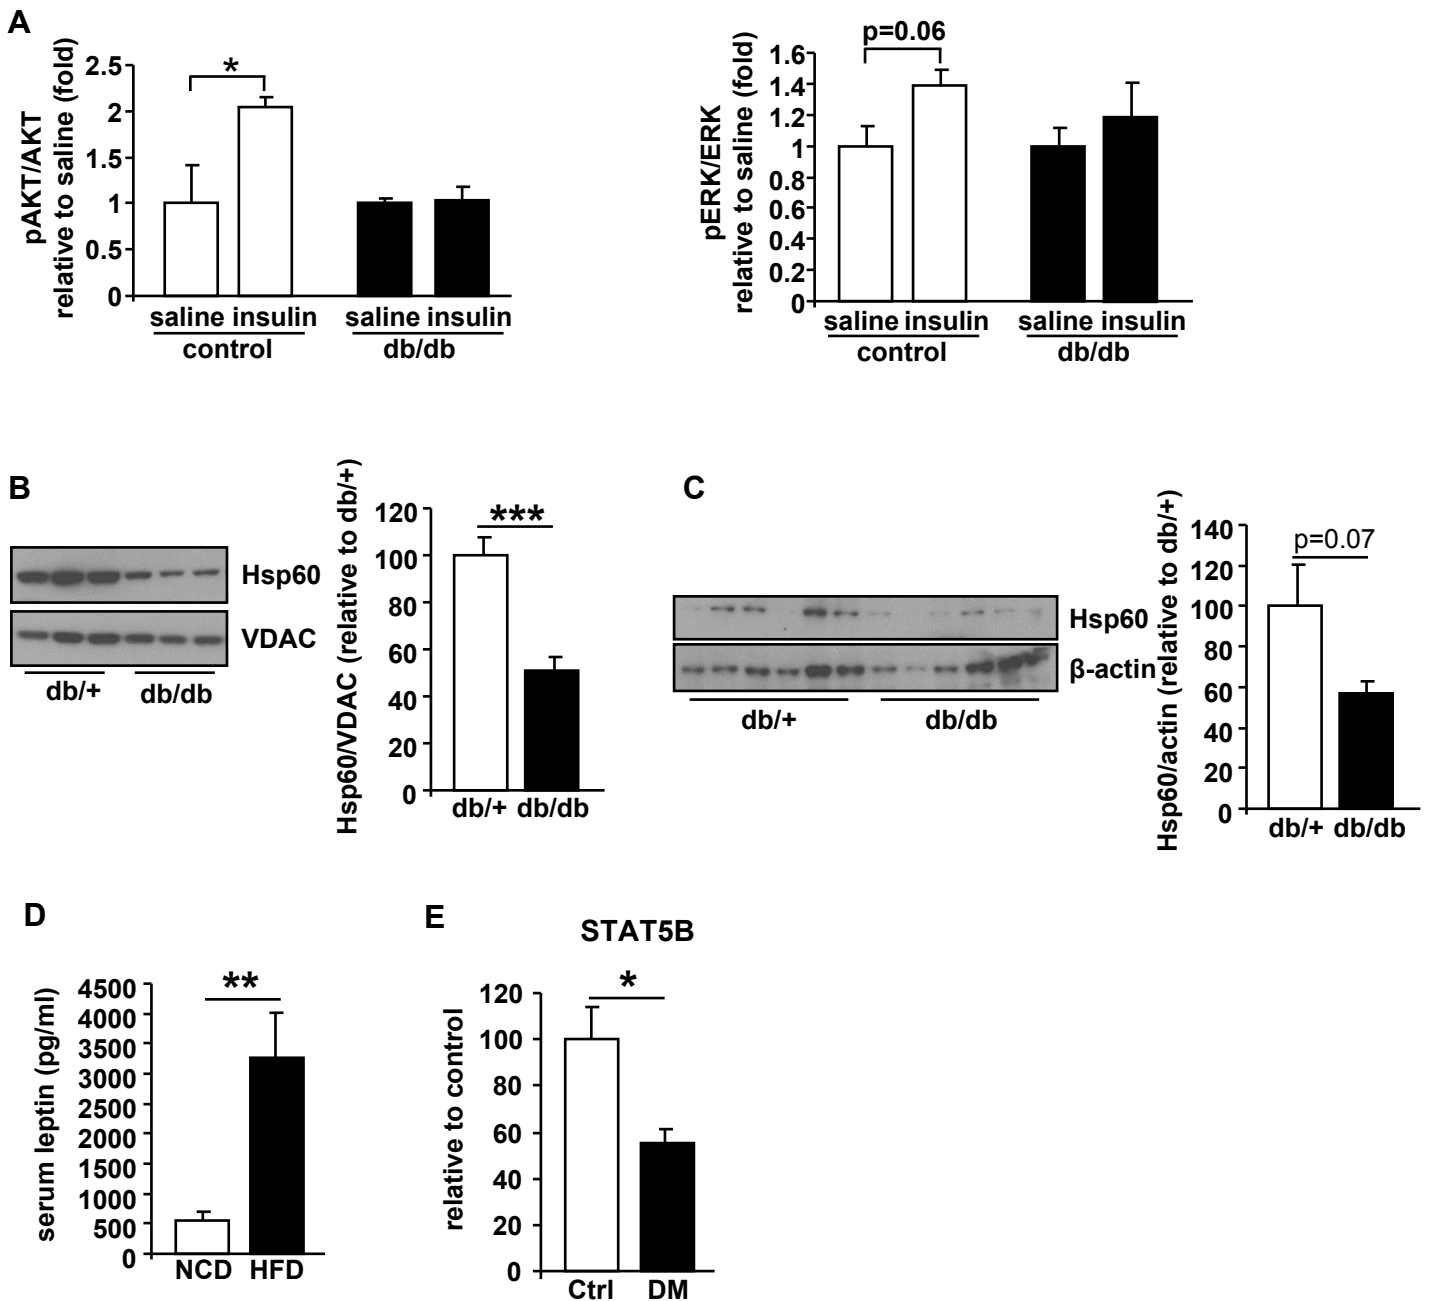

### Suppl Figure 1

Hsp60 reduction is associated with central insulin resistance

(A) Densitometric analysis of AKT and ERK activation after insulin stimulation in the hypothalamus of control and db/db mice (n=3-5). (B) Western blot and densitometric analysis of Hsp60 of isolated mitochondria from hypothalami of db/+ and db/db mice (each n=6). VDAC served as loading control for mitochondrial content. (C) Western blot and densitometric analysis of cytoplasmic Hsp60 of hypothalami from db/+ and db/db mice (each n=6). β-actin served as loading control. (D) Serum leptin levels of mice fed a NCD or HFD for 14 weeks (n=4-5). (E) Gene expression analysis of STAT5B of hypothalami from control and type 2 diabetes mellitus patients (n=3-4). Displayed values are means ± S.E.M.; \*, p ≤ 0.05; \*\*\*, p ≤ 0.001

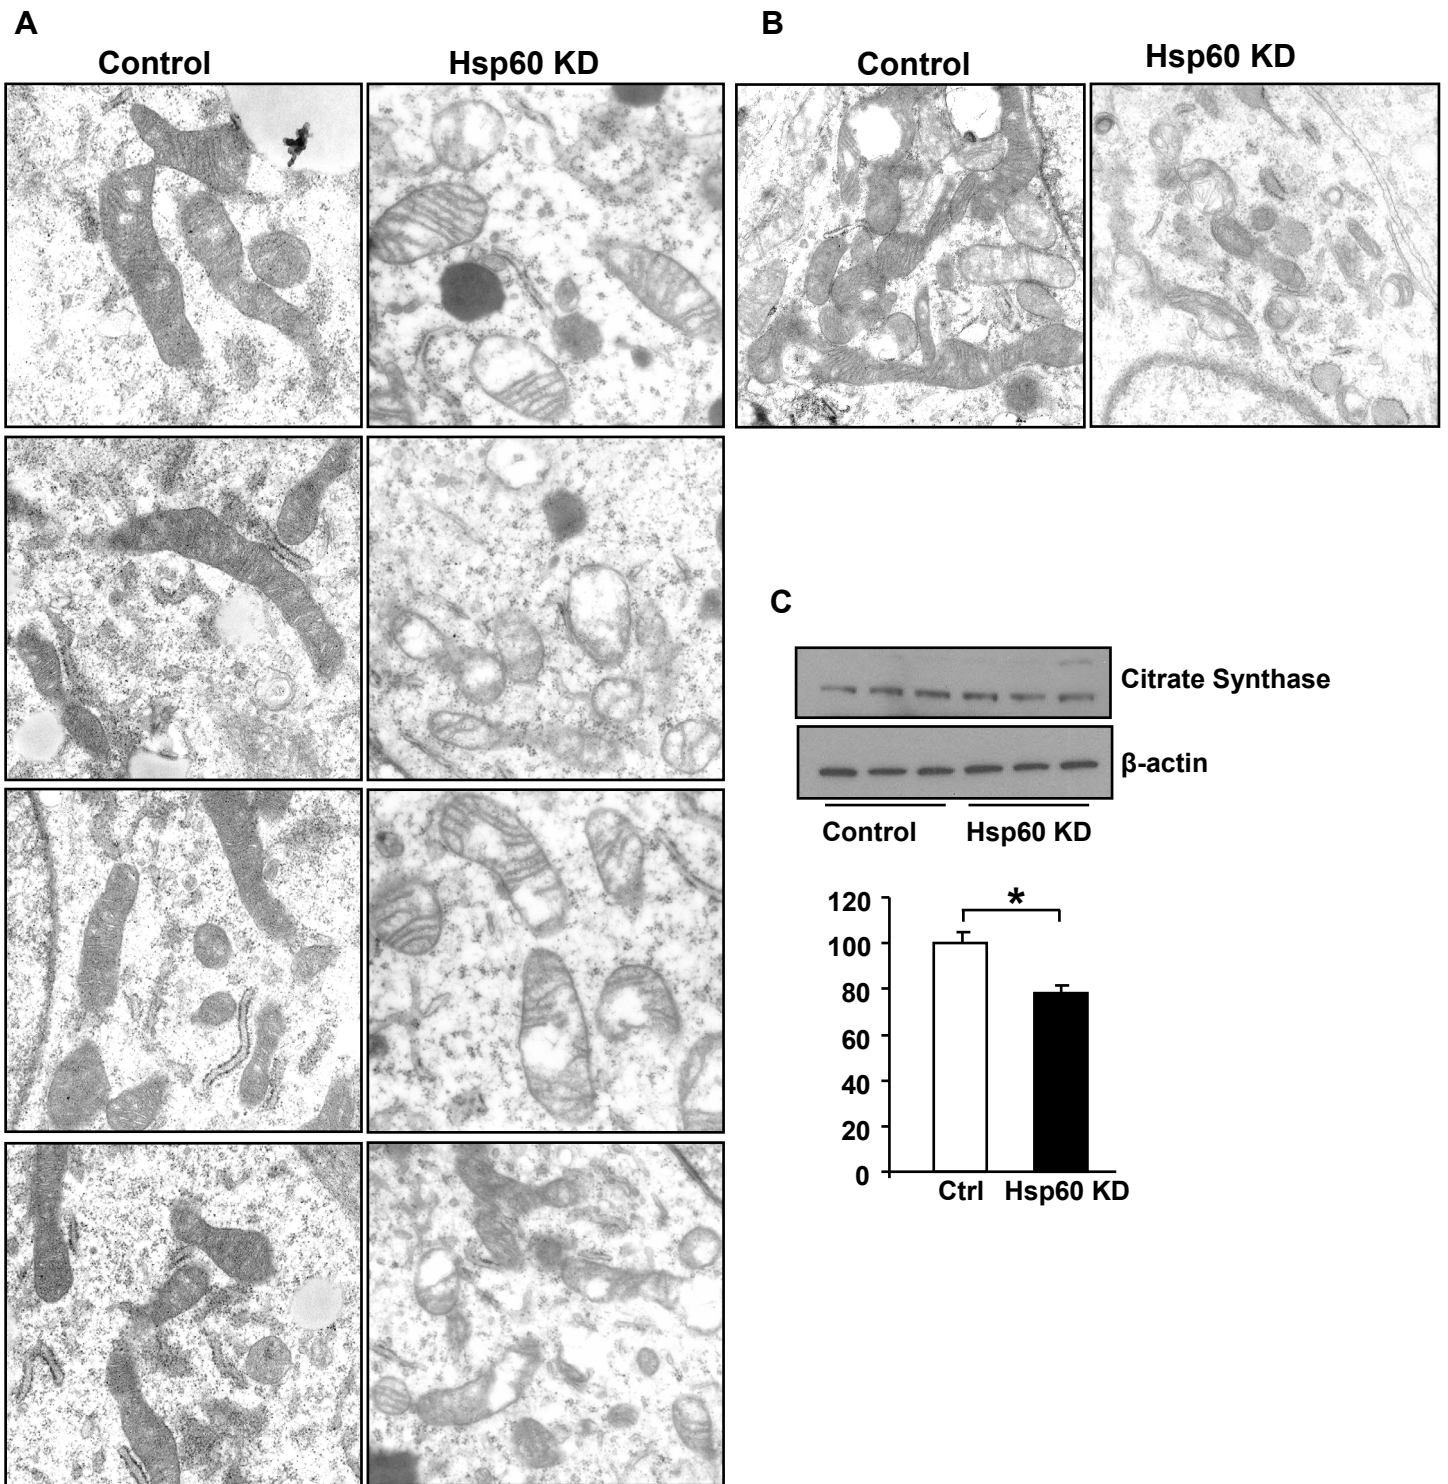

### Suppl Figure 2

Hsp60 knockdown causes mitochondrial dysfunction, Electron microscopic pictures of mitochondria from control and Hsp60 KD in two different neuronal cell lines (**A**) N25/2 (Total magnification 1:46550) and (**B**) GT1-7 (Total magnification 1:34500) (**C**) Western blot and densitometric analysis of citrate synthase in control and Hsp60 KD cells (each n=3).  $\beta$ -actin served as a loading control. Displayed values are means  $\pm$  S.E.M.; \*,  $p \leq 0.05$ .

**A**

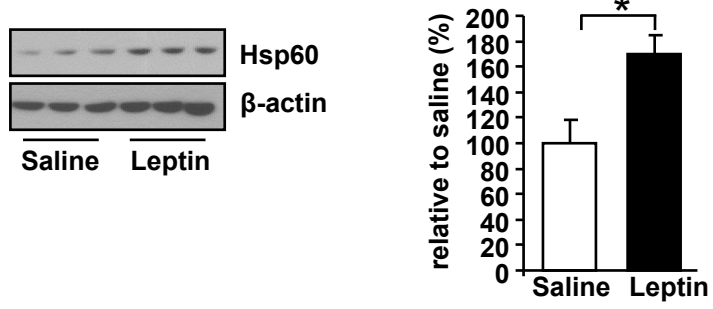

**Suppl Figure 3**

Hypothalamic Hsp60 expression in C57Bl/6 mice (**A**) Western blot and densitometric analysis of Hsp60 of hypothalami from mice treated with saline or leptin for 2h (each n=3-6).  $\beta$ -actin served as a loading control. Displayed values are means  $\pm$  S.E.M.; \*,  $p \leq 0.05$ .

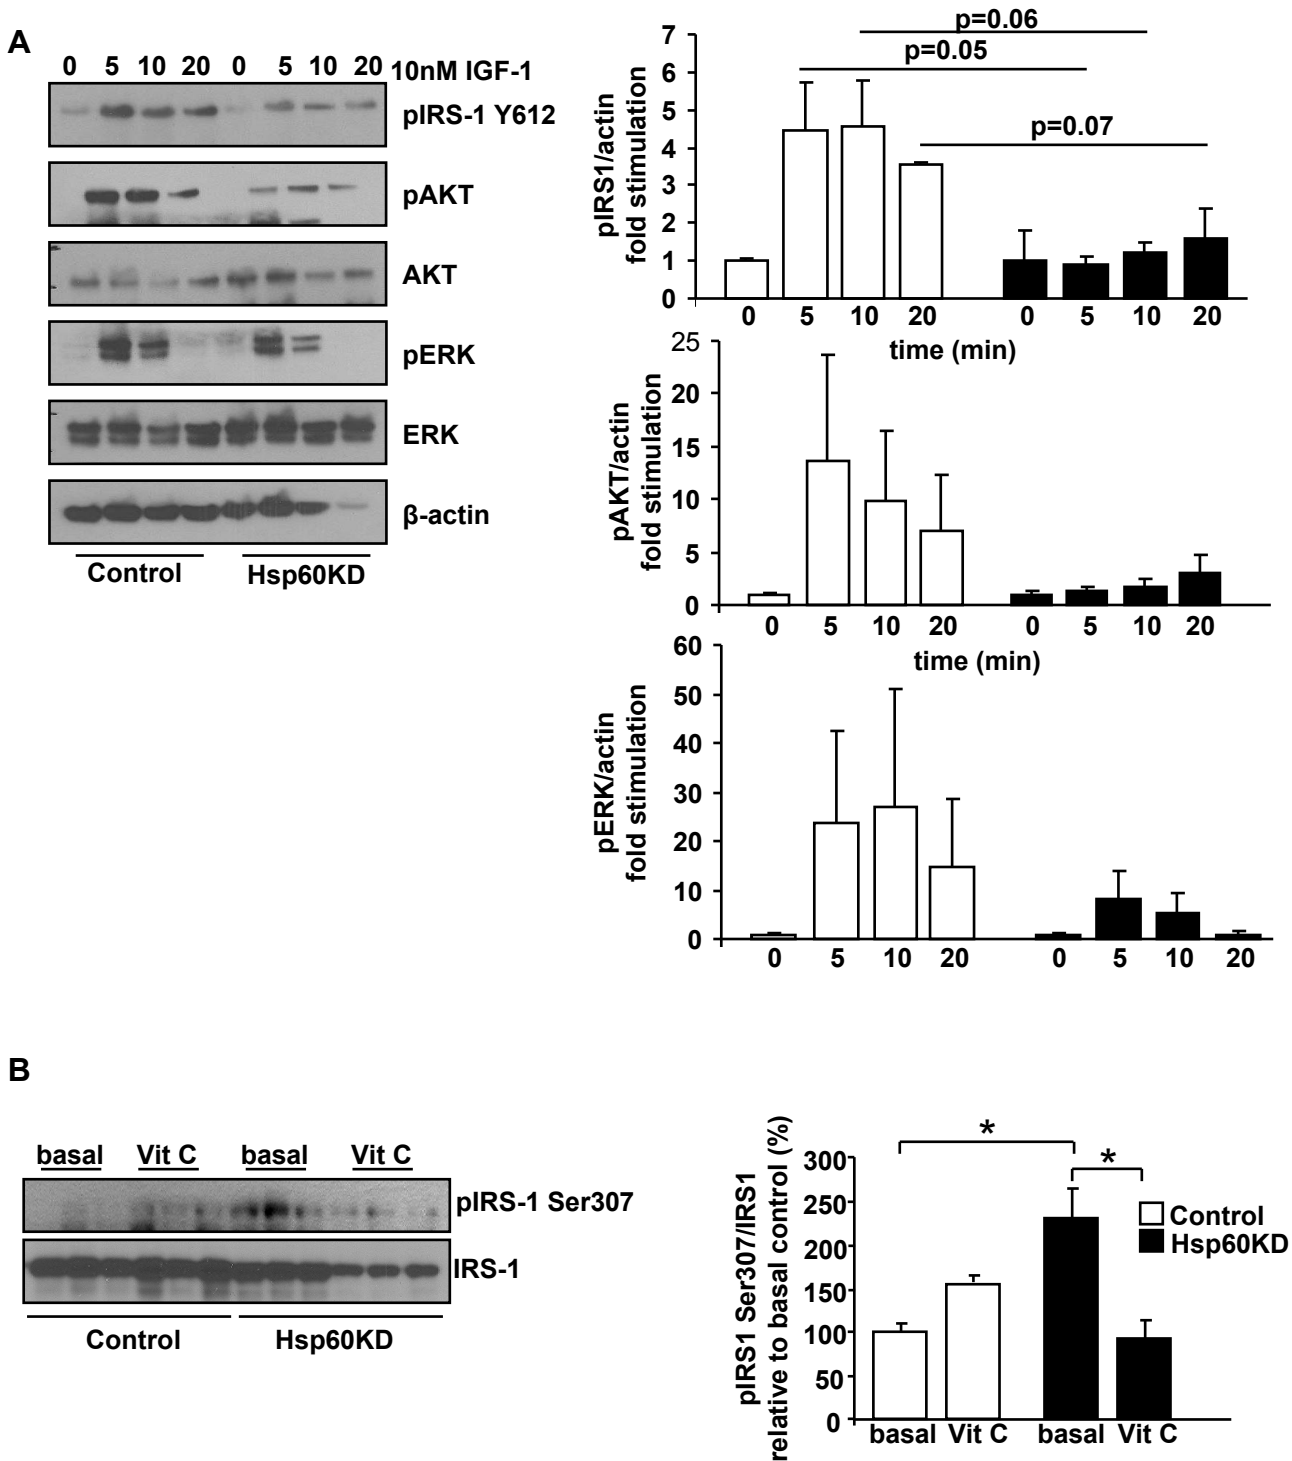

### Suppl Figure 4

Insulin and IGF-1 resistance in Hsp60 KD cells. **(A)** Western blot and densitometric analysis of 10nM IGF-1 stimulated phosphorylation of IRS-1, AKT and ERK in control and Hsp60 KD cells (n=5). **(B)** Western blot and densitometric analysis of phosphorylated IRS1 Ser307 of control and Hsp60 KD cells treated with vitamin C. Displayed values are means  $\pm$  S.E.M.; \*,  $p \leq 0.05$ .

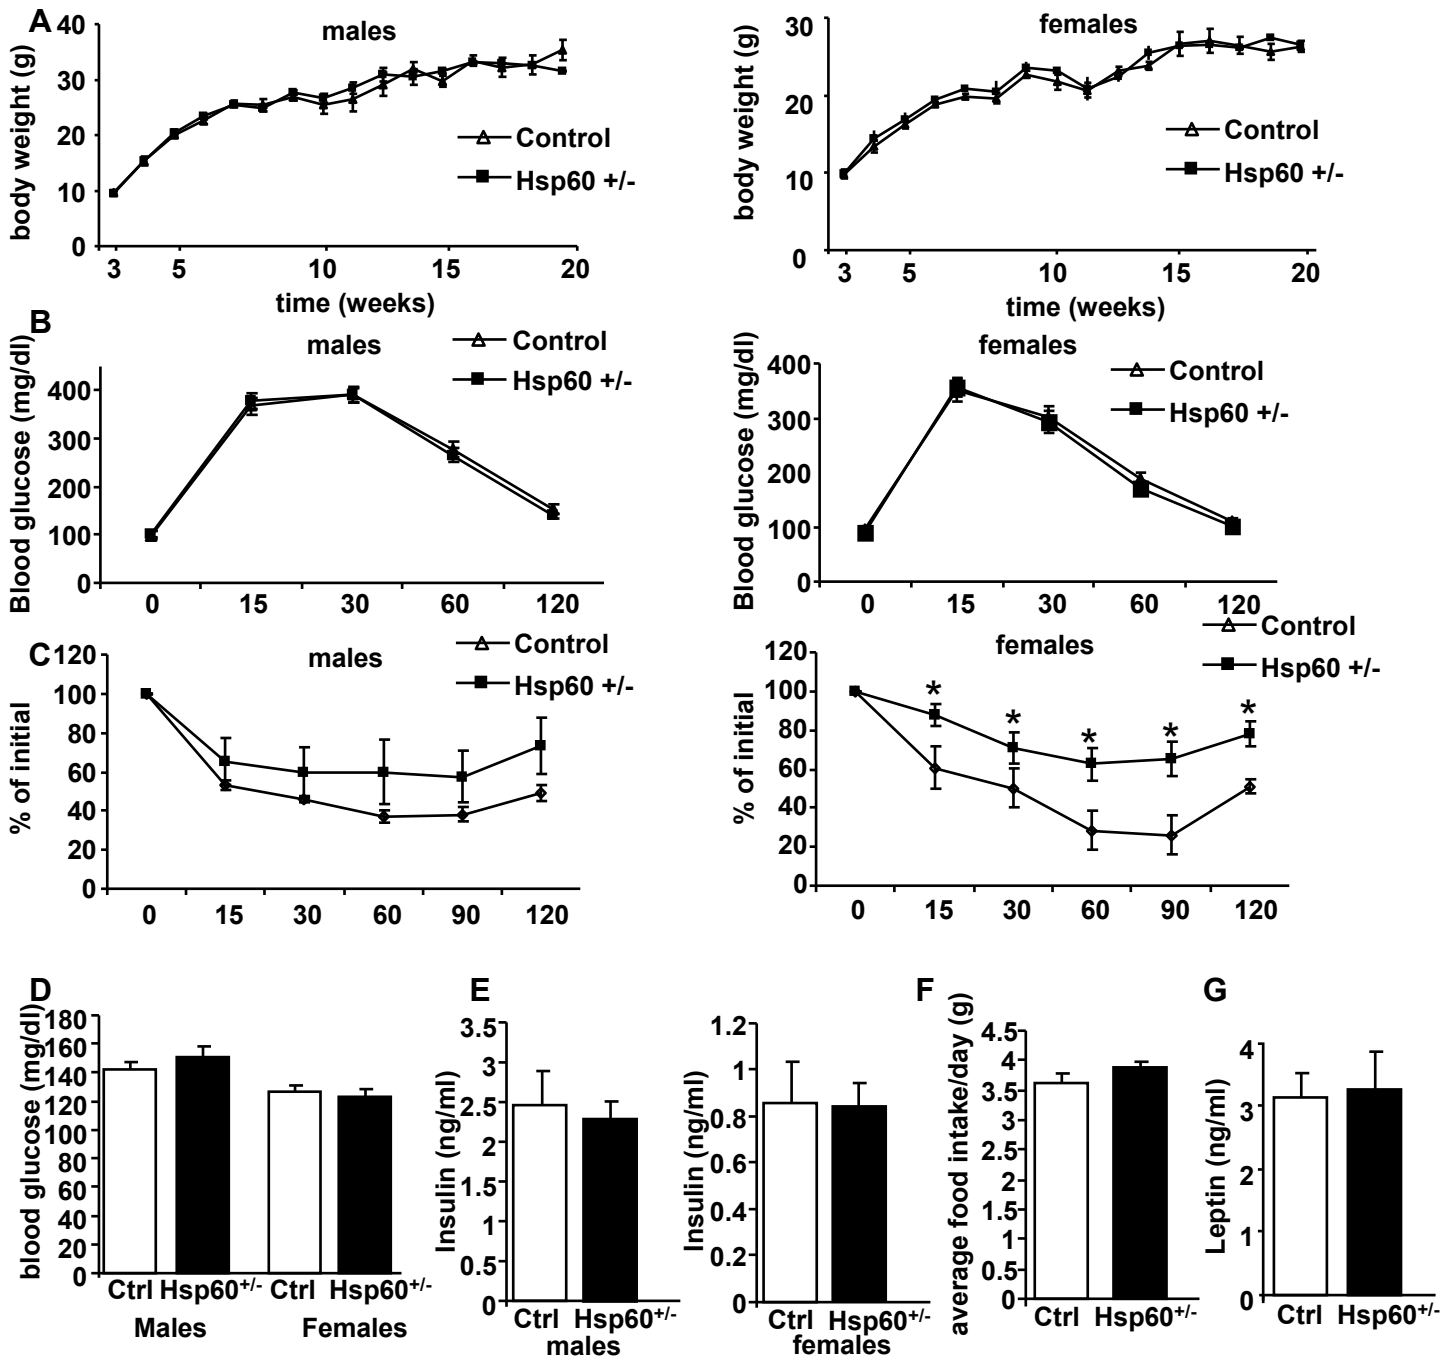

### Suppl Figure 5

Metabolic phenotype of Hsp60 heterozygous mice. **(A)** Body weight curve of control and Hsp60<sup>+/-</sup> male and female mice over the time of 20 weeks (n=11-13). **(B)** Glucose tolerance test of 12-week old control and Hsp60<sup>+/-</sup> male and female mice (n=10-13). **(C)** Insulin tolerance test of 16-week old control and Hsp60<sup>+/-</sup> male and female mice (n=5-9). **(D)** Random blood glucose levels of 20-week old control and Hsp60<sup>+/-</sup> male and female mice (n=5-8). **(E)** Serum insulin levels of 16-week old control and Hsp60<sup>+/-</sup> male and female mice (n=13-16). **(F)** Average food intake of 20-week old control and Hsp60<sup>+/-</sup> male mice (n=5-11). **(G)** Serum leptin levels of 16-week old control and Hsp60<sup>+/-</sup> male mice (n=10).

**H**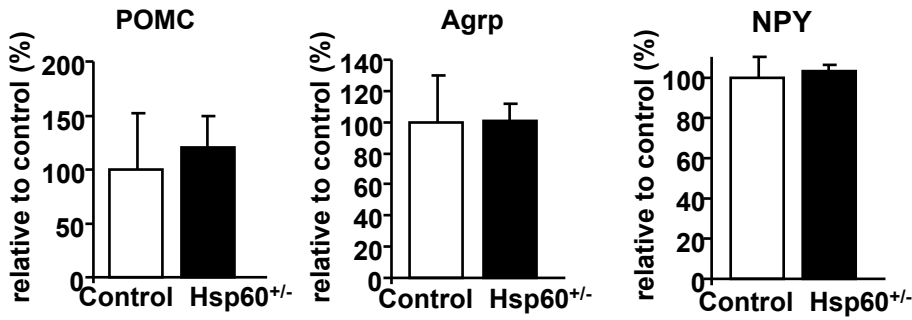**I**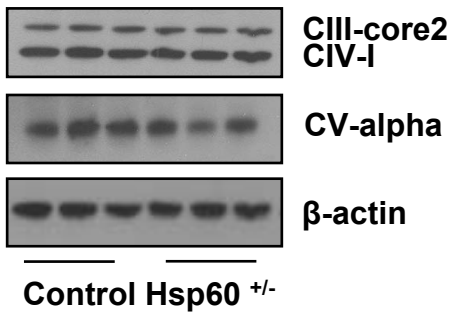**J**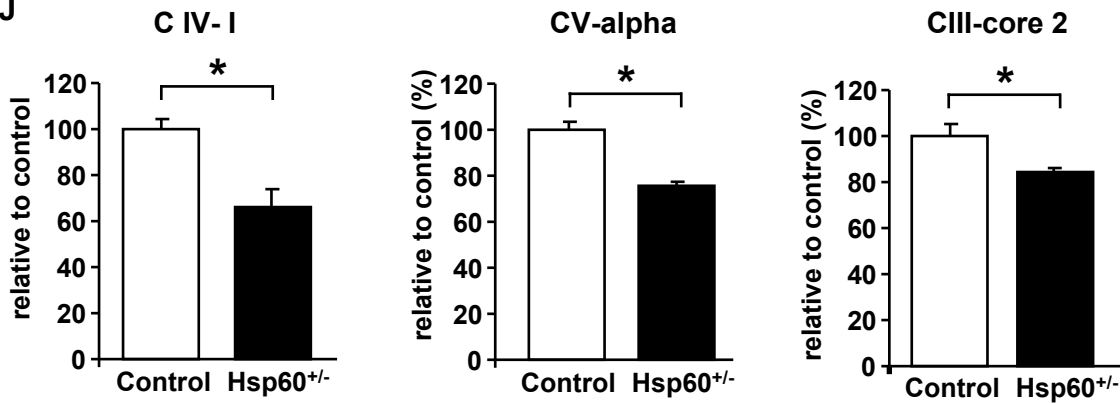**Suppl Figure 5**

Metabolic phenotype of Hsp60 heterozygous mice. **(H)** Hypothalamic expression of anorexigenic and orexigenic neuropeptides in control and Hsp60<sup>+/-</sup> mice (n=6-8). **(I)** Western blot analysis of mitochondrial proteins CV alpha, CIV-I and CIII-core 2 of dissected hypothalami of control and Hsp60<sup>+/-</sup> mice (each n=3).  $\beta$ -actin served as a loading control. **(J)** Densitometry of western blot analysis. Values are means  $\pm$  S.E.M.; \*, p  $\leq$  0.05.

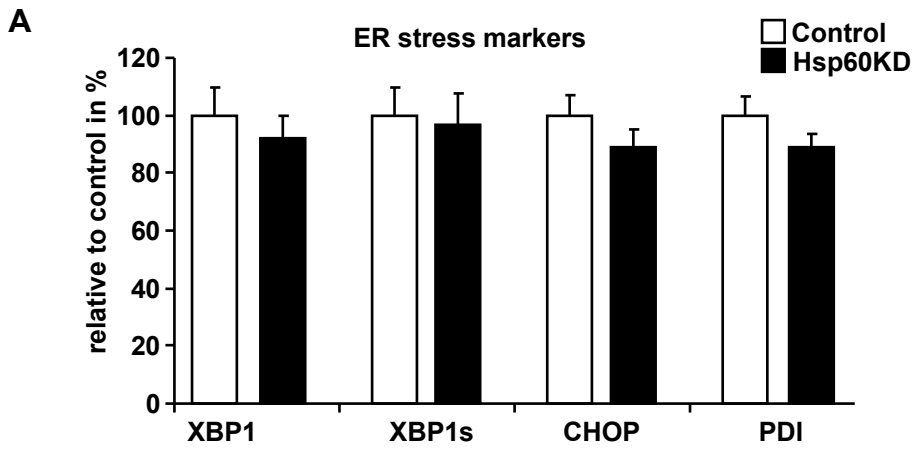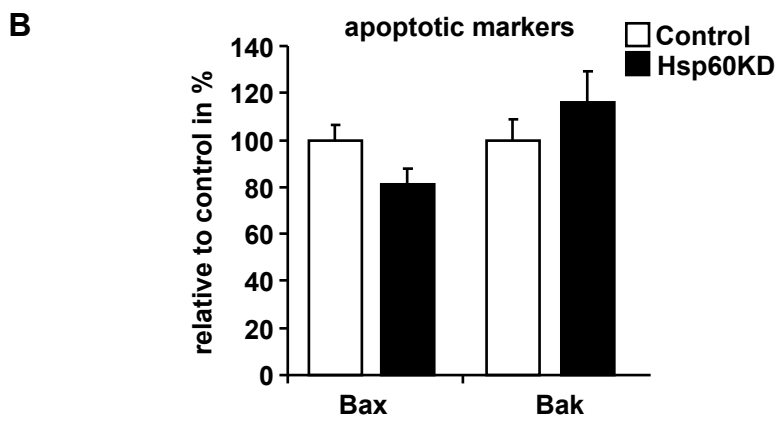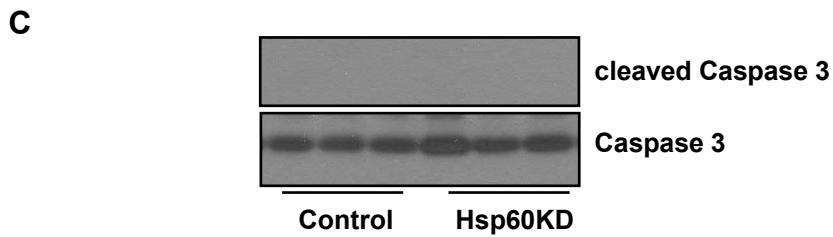

### Suppl Figure 6

Acute downregulation of Hsp60 in the hypothalamus does not induce ER stress or apoptosis. **(A)** Gene expression analysis of ER stress and **(B)** pro-apoptotic markers in hypothalamic samples of control and Hsp60 KD mice (n=7-8). **(C)** Western blot analysis of cleaved and total caspase 3 in hypothalamic samples control and Hsp60 KD mice (n=7-8).
